# Supplementary material for: Aptamer-based colorimetric determination of Pb2+ using a paper-based microfluidic platform
Source: Royal Society of Chemistry journal article supplement (doi:10.1039/c8ay01331d), 2018-01-01
Supplement: c8ay01331d1.pdf [file c8ay01331d1.pdf]

### Supplementary data

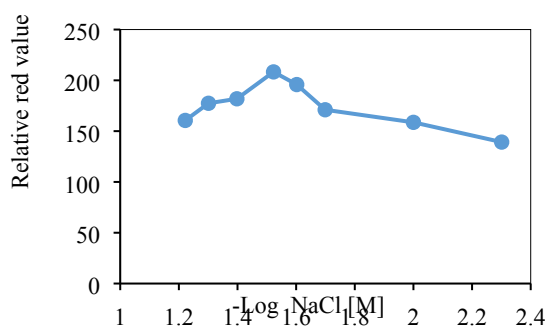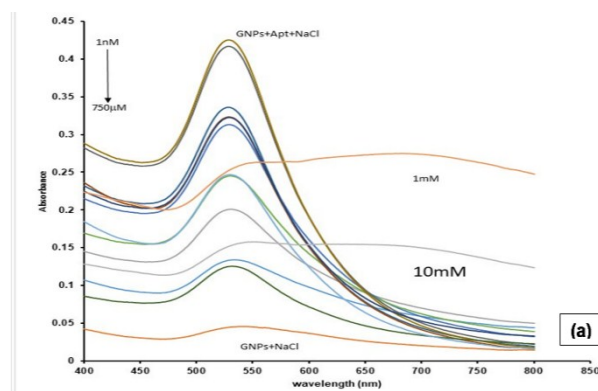

**Fig.S2.** (a) The UV-vis absorbance spectra of LBA-AuNP-NaCl solution over the concentrations of  $\text{Pb}^{2+}$  (10 nM to 1mM), b) changes in color detectable by naked eye

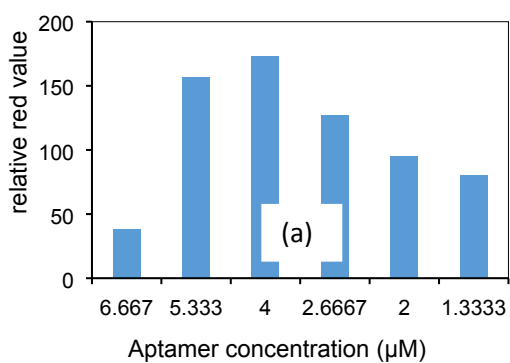

(a)

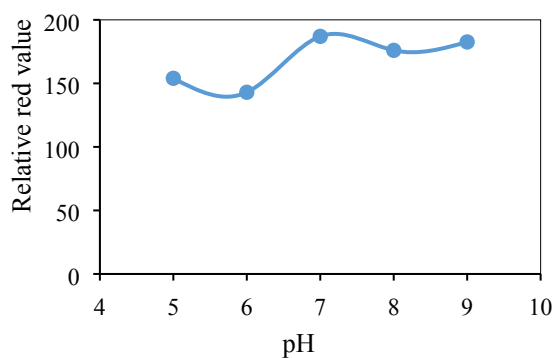

(b)

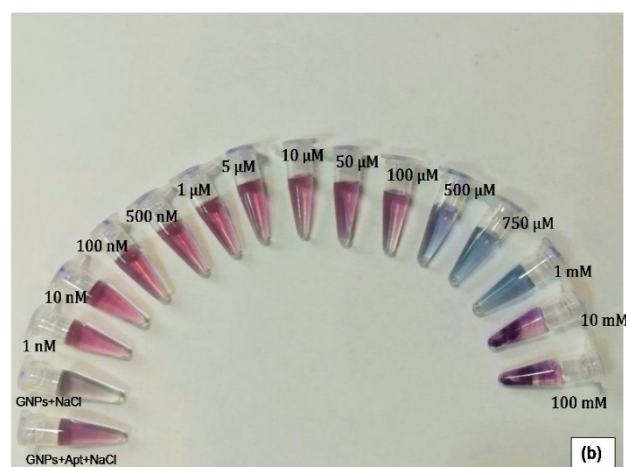

**Fig.S1.** Optimization of (a) NaCl concentration, (b) Aptamer concentration, (c) pH

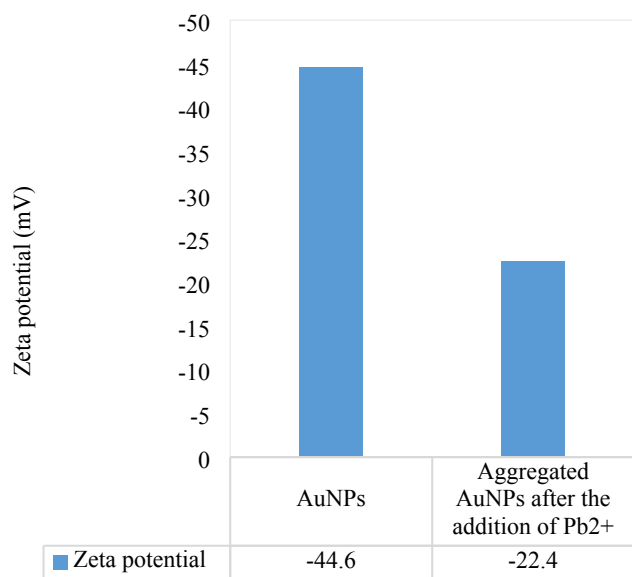

**Fig.S3** Zeta potential over the addition of Pb<sup>2+</sup> during the sensing procedure.
